# Supplementary material for: Liquid metal–polymer nano-microconjugations as an injectable and photo-activatable drug carrier
Source: Royal Society of Chemistry journal article supplement (doi:10.1039/d4me00028e), 2024-01-01
Supplement: d4me00028e1.pdf [file d4me00028e1.pdf]

[Electronic Supplementary Information]

Liquid metal-polymer nano-microconjugations as an injectable and photo-activatable drug carrier

Tomoka Hirose, Robin Rajan, Eijiro Miyako\*, Kazuaki Matsumura\*

School of Materials Science, Japan Advanced Institute of Science and Technology,  
1-1 Asahidai, Nomi, Ishikawa 923-1292, Japan

E-mail: [mkazuaki@jaist.ac.jp](mailto:mkazuaki@jaist.ac.jp), [e-miyako@jaist.ac.jp](mailto:e-miyako@jaist.ac.jp)

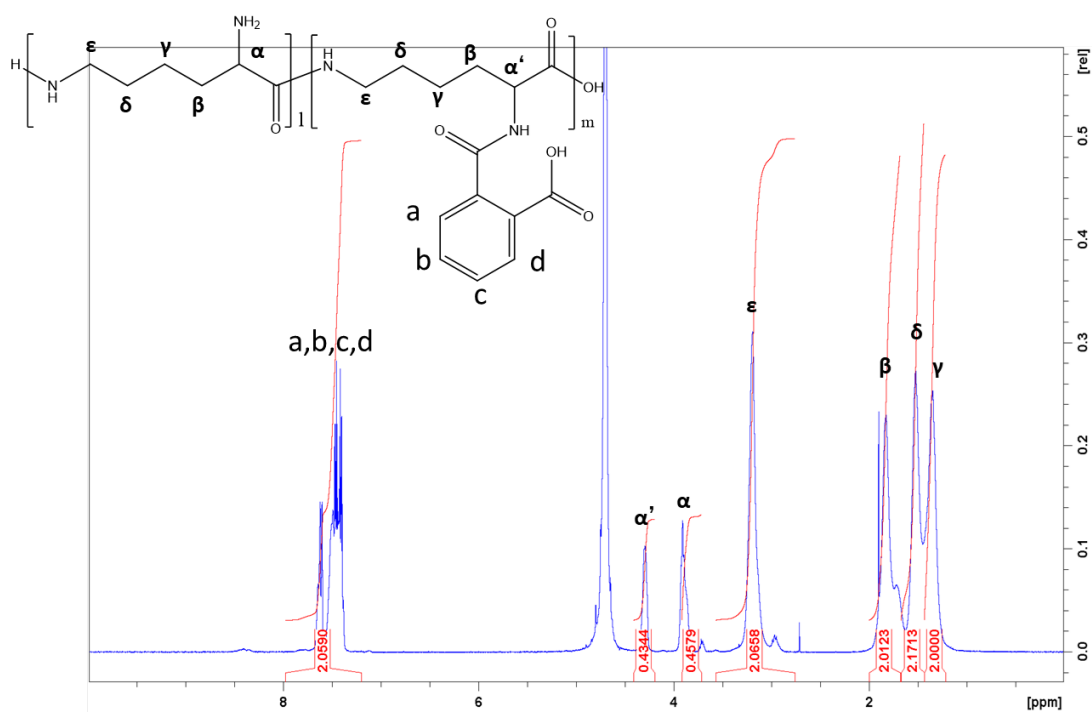

Fig. S1: <sup>1</sup>H-NMR of PLL-PA50 (solvent: D<sub>2</sub>O)

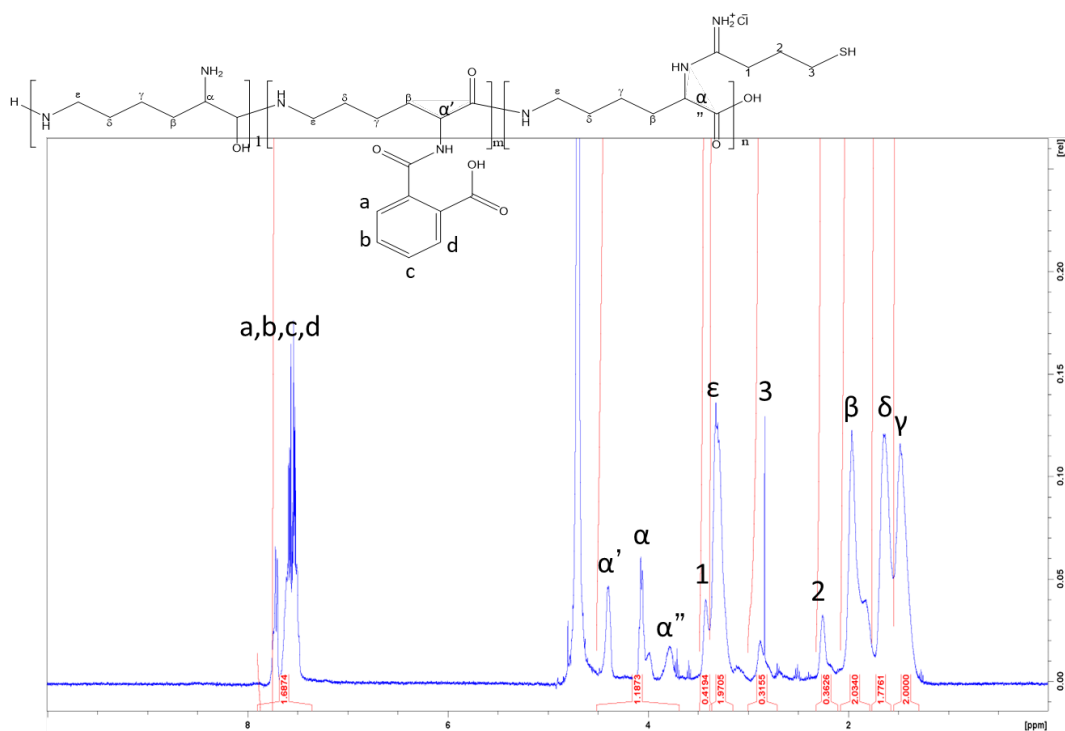

Fig. S2  $^1\text{H-NMR}$  of PLL-PA(-SH) (solvent:  $\text{D}_2\text{O}$ )

$$PA(\%) = \frac{\frac{[a, b, c, d]}{4}}{\frac{\delta}{4} + \frac{[a, b, c, d]}{4}} \times 100$$

$$2 - IT(\%) = \frac{\frac{[1]}{2}}{\frac{\delta}{6} + PA(\%) + \frac{[1]}{2}} \times 100$$

Table S1: Characterisation of polyampholytes

|             | Composition<br>(in feed) |               |             | Composition<br>(NMR) |               |             |
|-------------|--------------------------|---------------|-------------|----------------------|---------------|-------------|
|             | $\text{NH}_2$            | $\text{COOH}$ | $\text{SH}$ | $\text{NH}_2$        | $\text{COOH}$ | $\text{SH}$ |
| PLL         | 100                      | 0             | 0           | 100                  | 0             | 0           |
| PLL-PA50    | 50                       | 50            | 0           | 49                   | 51            | 0           |
| PLL-PA(-SH) | 40                       | 40            | 20          | 40                   | 42            | 18          |

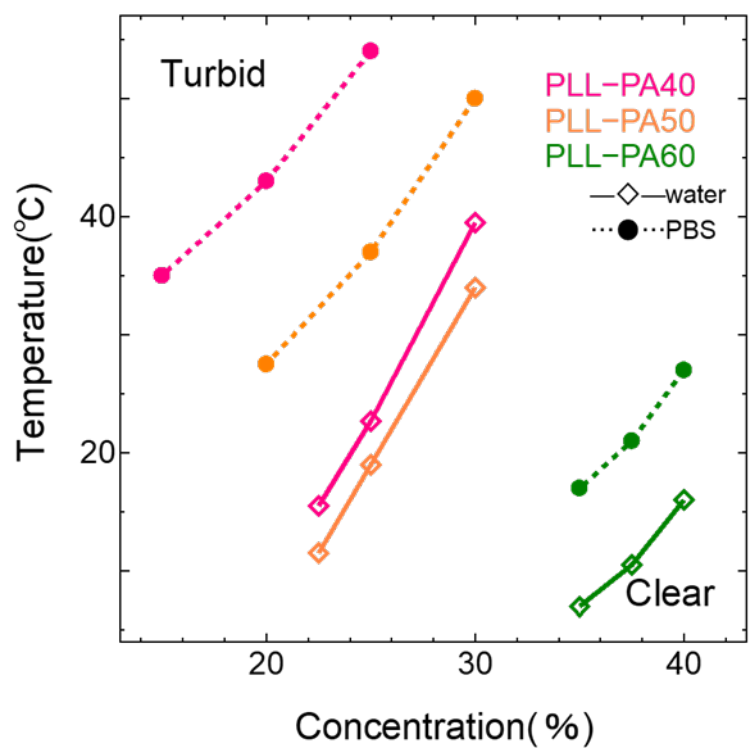

Fig. S3 Phase diagrams of PLL-PA at 40-60% PA incorporation in water and PBS.
